# Supplementary material for: Post-treatment of hyaluronan to decrease the apoptotic effects of carprofen in canine articular chondrocyte culture
Source: PeerJ. 2020 Jan 29;8:e8355. doi: 10.7717/peerj.8355 (PMC6995269; doi:10.7717/peerj.8355)
Supplement: Supplemental Information 1 [file peerj-08-8355-s001.xlsx]

## Sheet: Figure 1
Incubation time	Carprofen concentration	% cell viability (x)			mean	sd
		R1	R2	R3
24	0	131.224	92.4347	76.3411	100	28.2128
	25	31.7744	35.4883	38.7895	35.3508	3.50959
	12.5	34.2503	32.5997	32.1871	33.0124	1.09178
	6.25	33.425	33.8377	35.0757	34.1128	0.859009
	3.125	41.2655	38.7895	41.6781	40.5777	1.56229
	1.5625	37.5516	38.3769	37.5516	37.8267	0.476493
	0.78125	33.425	35.901	32.1871	33.8377	1.89102
	0.39	86.6575	90.784	43.7414	73.7276	26.0507
	0.1953	135.763	73.8652	85.8322	98.4869	32.8322
	0.0976	61.4856	178.68	134.525	124.897	59.1873
	0.0488	74.2779	139.065	86.6575	100	34.3926
48	0	82.4934	82.2281	135.279	100	30.5524
	25	4.24403	4.77454	7.42706	5.48187	1.70533
	12.5	6.1008	2.65252	5.30504	4.68612	1.80553
	6.25	4.77454	7.42706	10.0796	7.42706	2.65252
	3.125	5.83554	7.1618	7.69231	6.89655	0.95638
	1.5625	8.22281	1.85676	0.530504	3.53669	4.11212
	0.78125	0.530504		1.32626	0.928382	0.562684
	0.39	7.1618	6.36605	12.7321	8.75332	3.46862
	0.1953	2.65252	9.01857	8.48806	6.71972	3.53227
	0.0976	63.9257	96.817	98.939	86.5606	19.631
	0.0488	140.053	95.2255	109.814	115.031	22.8646

## Sheet: Figure 3 MTT, Apoptosis, NO
Treatment	Time	group	MTT	Apoptosis	NO
Cont24	24hr	control	91.51	2.44	57.86
Cont24	24hr	control	79.54	0.95	79.29
Cont24	24hr	control	128.94	1.6	122.14
Cont24	24hr	control	104.45	1.38	122.14
Cont24	24hr	control	101.6	1.8	113.57
Cont24	24hr	control	93.95	1.75	105
Cont24	24hr	control	99.07	1.88	102.11
Cont24	24hr	control	101.93	2.022	101.22
Cont24	24hr	control	100.029	N.D.	98.22
Cont48	48hr	control	108.05	4.08	100.71
Cont48	48hr	control	127.2	1.12	96.43
Cont48	48hr	control	111.97	1.96	75
Cont48	48hr	control	99.17	9.52	75
Cont48	48hr	control	86.03	2.9	160.71
Cont48	48hr	control	100.21	4.28	160.71
Cont48	48hr	control	107.19	5.22	121.22
Cont48	48hr	control	114.62	3.98	101.9
Cont48	48hr	control	96.29	4.91	131.11
CAR24	24hr	control	67.9	4.17	135
CAR24	24hr	control	67.14	3.7	122.14
CAR24	24hr	control	55.93	3.7	109.29
CAR24	24hr	control	25.02	15.15	143.57
CAR24	24hr	control	64	5.71	147.86
CAR24	24hr	control	42.11	3.7	139.29
CAR24	24hr	control	84.45	10.26	N.D.
CAR24	24hr	control	78.89	3.03	N.D.
CAR24	24hr	control	85.38	2.22	N.D.
CAR48	48hr	control	22.52	8.33	143.57
CAR48	48hr	control	24.48	6.25	152.14
CAR48	48hr	control	14.15	10	203.57
CAR48	48hr	control	28.63	7.27	229.29
CAR48	48hr	control	25.16	26.09	345
CAR48	48hr	control	33.08	6.19	327.86
CAR48	48hr	control	52.9	10.71	245.982
CAR48	48hr	control	49.19	5.38	298.761
CAR48	48hr	control	53.36	6.49	N.D.
HA24	24hr	control	132.86	0.72	36.43
HA24	24hr	control	63.52	1.85	70.71
HA24	24hr	control	65.25	1.01	92.14
HA24	24hr	control	73.8	0.51	113.57
HA24	24hr	control	120.42	3.42	62.14
HA24	24hr	control	75.41	5.26	87.86
HA24	24hr	control	93.27	2.17	83.213
HA24	24hr	control	98.211	N.D.	65.213
HA24	24hr	control	101.23	N.D.	59.762
HA48	48hr	control	122.63	1.67	92.14
HA48	48hr	control	117.52	0.86	96.43
HA48	48hr	control	102.36	0.83	83.57
HA48	48hr	control	94.51	4.12	96.43
HA48	48hr	control	87.98	1.74	165
HA48	48hr	control	91.65	2.86	105
HA48	48hr	control	118.79	0.94	91.222
HA48	48hr	control	127.38	1.1	N.D.
HA48	48hr	control	N.D.	1.06	N.D.
Comb24	24hr	treatment	19.04	2.7	96.43
Comb24	24hr	treatment	13.55	3.77	92.14
Comb24	24hr	treatment	71.65	4.17	199.29
Comb24	24hr	treatment	66.3	10.53	225
Comb24	24hr	treatment	76.59	2.33	195
Comb24	24hr	treatment	68.123	3.89	186.43
Comb24	24hr	treatment	74.912	4.123	145.123
Comb24	24hr	treatment	N.D.	5.12	145.312
Comb24	24hr	treatment	N.D.	3.891	139.332
Comb48	48hr	treatment	6.31	19.05	169.29
Comb48	48hr	treatment	6.64	17.39	195
Comb48	48hr	treatment	5.55	15.38	229.29
Comb48	48hr	treatment	5	17.39	293.57
Comb48	48hr	treatment	12.16	14.81	250.71
Comb48	48hr	treatment	4.66	20	246.43
Comb48	48hr	treatment	36.32	17.39	200.12
Comb48	48hr	treatment	33.26	21.21	267.11
Comb48	48hr	treatment	7.2	13.79	N.D.
Pretr	24hr	treatment	24.59	2.11	79.29
Pretr	24hr	treatment	26.33	4.76	87.86
Pretr	24hr	treatment	68.38	4.17	186.43
Pretr	24hr	treatment	68.45	3.13	225
Pretr	24hr	treatment	78.56	4.11	139.29
Pretr	24hr	treatment	57.99	5.71	135
Pretr	24hr	treatment	79.43	3.23	106.32
Pretr	24hr	treatment	43.33	3.64	114.922
Pretr	24hr	treatment	N.D.	6.45	N.D.
Posttr	24hr	treatment	13.17	4.55	57.86
Posttr	24hr	treatment	11.21	2.86	66.43
Posttr	24hr	treatment	16.61	2.78	75
Posttr	24hr	treatment	16.54	4.17	92.14
Posttr	24hr	treatment	6.53	2.08	199.29
Posttr	24hr	treatment	80.96	1.61	199.29
Posttr	24hr	treatment	59.3	3.85	80.867
Posttr	24hr	treatment	77.24	6.45	89.011
Posttr	24hr	treatment	20.765	4.17	N.D.

## Sheet: Figure 4 apoptosis gene exp
Treatment	Time	group	CASP3	CASP8	CASP9	BAX	BCL2	BCLxL	NOS2
Cont24	24hr	control	0.703185	N.D	1.56459	0.897037	0.831748	1.38323	1.02235
Cont24	24hr	control	0.97161	0.91152	N.D	1.51287	0.815574	N.D	0.90555
Cont24	24hr	control	1.00983	1.24677	0.765345	1.07929	1.60318	0.801984	2.10292
Cont24	24hr	control	1.09283	1.50312	0.734083	1.17407	1.46794	0.891927	1.3813
Cont24	24hr	control	1.28548	1.13383	0.891918	0.85718	0.949149	0.743292	0.455507
Cont24	24hr	control	1.03174	0.954113		0.678395	0.659963	0.625569	0.816361
Cont48	48hr	control	0.765543	0.536987	1.0634	0.589122	0.607696	0.763057	0.463171
Cont48	48hr	control	0.652058	0.75879	1.3366	0.654783	0.555901	0.854739	0.753762
Cont48	48hr	control	0.683769	0.840304	0.670844	0.792575	0.71465	0.791071	0.537187
Cont48	48hr	control	0.79342	0.727645	0.826753	0.975581	0.902264	1.23045	0.75972
Cont48	48hr	control	0.283884	0.665188	0.754184	0.383925	0.478321	0.729729	0.373159
Cont48	48hr	control	0.323391	0.51463	0.719196	0.493411	0.466696	0.710375	0.326433
CAR24	24hr	control	N.D	0.538032	0.868562	N.D	1.05112	1.24949	0.63746
CAR24	24hr	control	N.D	0.657123	0.791734	N.D	1.06302	1.20343	0.818172
CAR24	24hr	control	3.31939	0.721453	0.796812	3.10567	1.70362	1.03406	2.76944
CAR24	24hr	control	3.45753	0.73299	0.887115	3.16706	1.55407	1.0986	2.39146
CAR24	24hr	control	6.02056	1.21527	1.36113	3.8441	5.54849	2.92029	2.15351
CAR24	24hr	control	6.10393	1.73209	1.40281	3.93026	5.34715	3.06228	1.45096
CAR48	48hr	control	N.D	34.8349	1.00873	5.58808	118.168	31.9909	348.402
CAR48	48hr	control	N.D	23.8176	0.865444	4.32374	139.355	23.9641	312.948
CAR48	48hr	control	5.14697	28.9828	1.80809	3.90579	129.983	29.1837	321.384
CAR48	48hr	control	5.11647	31.9284	1.56458	3.9123	120.938	21.9387	342.928
CAR48	48hr	control	12.9107	29.8375	2.46366	6.16641	N.D	28.9819	339.928
CAR48	48hr	control	10.7976	N.D	2.31186	4.48206	136.928	27.9827	N.D
HA24	24hr	control	1.03296	0.878325	1.5561	1.09748	0.748364	2.16515	1.09566
HA24	24hr	control	0.947924	0.979979	1.40227	0.988794	0.652756	2.35867	0.692252
HA24	24hr	control	0.801069	0.851882	0.805199	0.972469	1.42404	0.620198	1.16286
HA24	24hr	control	0.954825	0.613849	0.829907	0.998799	1.44067	0.547575	1.98263
HA24	24hr	control	0.689452	0.750985	0.762882	0.584418	0.586765	1.38737	0.595067
HA24	24hr	control	0.799674	0.834868	0.755234	0.643529	0.626341	1.06916	0.416797
HA48	48hr	control	0.507264	0.41093	1.47325	0.449256	0.321928	0.676154	0.603458
HA48	48hr	control	0.435172	0.359978	1.26367	0.483595	0.327863	1.03815	0.234987
HA48	48hr	control	0.644212	0.569753	0.642108	0.6858	1.2897	N.D	N.D
HA48	48hr	control	0.622625	0.520829	0.572883	0.653218	1.30434	N.D	N.D
HA48	48hr	control	0.720599	0.659619	0.627937	0.474073	0.571475	1.29766	0.200907
HA48	48hr	control	0.761511	0.908007	0.734461	0.698207	0.643108	1.62312	0.428064
Comb24	24hr	treatment	4.86636	1.56866	3.08475	3.96296	1.57897	7.42731	1.22342
Comb24	24hr	treatment	4.04277	1.63039	2.75539	2.82411	1.07737	4.31183	1.18125
Comb24	24hr	treatment	2.48756	0.689853	0.638619	3.35693	1.01127	N.D	2.30015
Comb24	24hr	treatment	2.74821	1.60684	0.871351	2.54105	1.18345	N.D	3.44163
Comb24	24hr	treatment	2.48756	0.691381	0.81768	2.10724	2.28064	2.12998	1.00516
Comb24	24hr	treatment	2.74821	1.2946	1.66217	4.69196	4.5124	2.55247	1.48049
Comb48	48hr	treatment	9.23639	0.823438	4.08785	3.81293	9.32219	8.57211	N.D
Comb48	48hr	treatment	9.43641	1.06381	3.17043	3.48697	10.2312	11.2737	4.02252
Comb48	48hr	treatment	3.25402	1.22029	1.90874	3.50743	9.98272	6.22223	9.95884
Comb48	48hr	treatment	2.61743	1.36954	2.10128	3.38563	N.D	5.42433	6.34817
Comb48	48hr	treatment	N.D	2.1568	N.D	4.56366	10.3397	4.07614	8.98942
Comb48	48hr	treatment	N.D	1.85118	N.D	4.49473	9.32487	3.8467	7.77065
Pretr	24hr	treatment	3.30332	1.26265	1.82937	N.D	0.712854	4.18951	0.871568
Pretr	24hr	treatment	3.08797	1.08035	1.61309	N.D	0.642494	3.4689	0.596658
Pretr	24hr	treatment	2.5368	1.63461	0.982027	3.37094	1.68895	3.0346	1.77805
Pretr	24hr	treatment	2.5412	1.39814	1.20472	3.3932	1.78193	2.64215	1.04008
Pretr	24hr	treatment	5.57508	2.61937	1.80185	3.34999	2.38671	4.39883	1.23824
Pretr	24hr	treatment	6.10453	1.96709	1.70433	3.39904	2.00455	3.75219	0.861059
Posttr	24hr	treatment	0.734355	0.352488	0.905637	0.364093	N.D	0.524357	0.607784
Posttr	24hr	treatment	0.580858	0.312991	0.874958	0.33546	N.D	0.55254	0.707601
Posttr	24hr	treatment	1.23326	N.D	0.513931	0.895633	2.52035	1.54645	N.D
Posttr	24hr	treatment	1.14116	0.284417	0.551871	0.867963	2.57628	0.83316	N.D
Posttr	24hr	treatment	0.684064	0.209082	0.490483	0.543313	1.0072	N.D	0.404978
Posttr	24hr	treatment	0.759702	0.311397	0.646975	0.608626	0.809845	N.D	0.711888

## Sheet: Figure 5 cartilage gene exp
treatment	Time	group	MMP2	MMP9	TIMP1	HAS1	IL1B	COL2A1	ACAN
Cont24	24hr	control	0.843149	1.51487	1.7819	1.64743	0.841645	1.1851	0.704213
Cont24	24hr	control	1.18603	1.23125	N.D	1.34918	0.604672	0.843807	1.42003
Cont24	24hr	control	1.09762	0.660122	0.780949	N.D	1.10531	0.907623	0.578881
Cont24	24hr	control	0.911063	0.978263	0.718609	1.04682	1.77774	1.10178	0.536265
Cont48	48hr	control	1.17198	0.397075	1.53003	0.830251	1.10858	1.79212	0.797483
Cont48	48hr	control	1.17996	0.578009	1.4722	1.07229	1.11711	2.18202	0.980952
Cont48	48hr	control	2.53283	0.34802	1.65219	N.D	0.706008	0.543292	0.698278
Cont48	48hr	control	2.75353	N.D	N.D	0.853619	1.08007	0.478158	0.893204
CAR24	24hr	control	2.02396	4.88892	0.08083	2.9048	0.958407	N.D	0.548742
CAR24	24hr	control	N.D	3.68969	0.0825087	1.53194	0.504017	0.765193	0.532042
CAR24	24hr	control	5.17321	4.132i3423	0.0176769	3.61908	0.801673	0.70408	0.0916669
CAR24	24hr	control	4.75324	N.D	N.D	2.55433	0.76488	0.833941	0.054379
CAR48	48hr	control	30.1231	26.841	0.0171405	6.89237	243.018	N.D	N.D
CAR48	48hr	control	29.1232	52.768	0.015822	5.87139	148.442	2.67391	1.7515
CAR48	48hr	control	30.5569	38.9283	0.016732	6.81397	195.732	2.18107	0.359878
CAR48	48hr	control	30.9361	32.8673	0.014251	6.98221	N.D	3.12199	0.454626
HA24	24hr	control	1.3614	0.739013	0.515435	2.95405	1.69443	1.34065	1.13921
HA24	24hr	control	1.07246	1.12675	0.501123	1.87021	1.12751	1.85421	1.22196
HA24	24hr	control	1.22929	0.986272	0.552145	1.75078	N.D	0.777474	0.562153
HA24	24hr	control	1.14276	N.D	0.531107	N.D	2.06511	0.942378	0.553412
HA48	48hr	control	2.52451	0.348451	0.267513	1.02918	0.518447	0.900465	0.729892
HA48	48hr	control	2.5598	0.443214	0.268051	1.12323	N.D	1.22515	0.644465
HA48	48hr	control	1.09292	0.461239	0.286342	1.02369	1.39321	0.698356	0.223323
HA48	48hr	control	1.1904	0.545975	0.273621	1.34452	0.532201	0.484999	0.309746
Comb24	24hr	treatment	10.4107	10.3875	1.63526	5.90096	2.72165	N.D	1.21011
Comb24	24hr	treatment	6.32516	9.99641	1.15219	3.17306	2.07076	1.27637	0.813113
Comb24	24hr	treatment	5.9725	10.1232	0.0120126	1.78026	1.05261	1.29687	0.938408
Comb24	24hr	treatment	11.8518	9.87625	0.0177689	1.83717	2.8864	1.71901	0.959075
Comb48	48hr	treatment	5.94017	33.7819	0.428482	N.D	1.46667	1.56485	1.15264
Comb48	48hr	treatment	6.77755	37.6402	0.509396	12.7047	1.40586	1.87184	1.16302
Comb48	48hr	treatment	40.8802	35.0917	0.0349097	19.9997	1.43081	7.93198	2.21633
Comb48	48hr	treatment	53.4088	N.D	N.D	17.6839	1.59231	8.75356	2.59723
Pretr	24hr	treatment	3.49066	1.4859	0.896949	4.24284	1.48106	1.64175	0.57856
Pretr	24hr	treatment	3.51214	1.61929	0.0531893	4.01788	1.42551	0.895503	0.614347
Pretr	24hr	treatment	9.1508	1.52312	0.0334379	3.06152	1.38131	0.907871	1.41101
Pretr	24hr	treatment	9.32019	1.49837	N.D	3.89271	1.16614	0.852766	1.47448
Posttr	24hr	treatment	1.24452	10.7686	1.58335	1.72273	1.55149	2.22321	0.232179
Posttr	24hr	treatment	0.987446	8.79361	1.74677	3.21313	1.35287	2.32146	0.252947
Posttr	24hr	treatment	3.05884	9.34582	1.67239	4.59405	1.01412	2.11151	0.140066
Posttr	24hr	treatment	2.56969	9.93273	1.63213	7.74567	1.45888	2.38884	0.123387
